# Supplementary material
Source: Springer Nature journal article supplement (https://www.springerprofessional.de/resource/supplementary/13638_2012_613_MOESM5_ESM.pdf/11898360)

**a**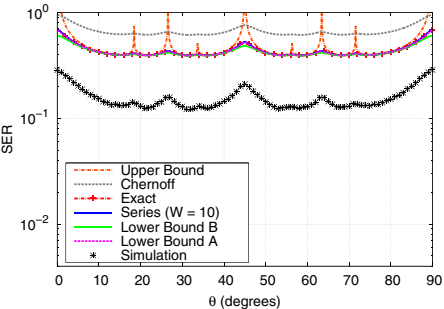

$\kappa = 0.1, \mu = 0.25, \text{SNR} = 26 \text{ dB}$  (Optimum  $\theta = 31.51^\circ$ ).

**b**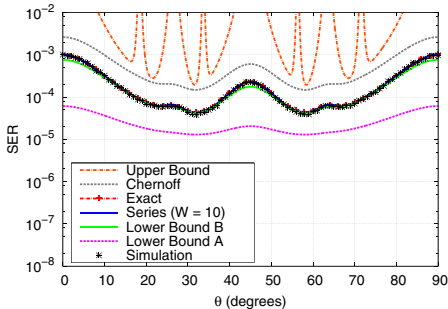

$\kappa = 1.5, \mu = 1.75, \text{SNR} = 26 \text{ dB}$  (Optimum  $\theta = 31.81^\circ$ ).

Supplement: MOESM5 [file 11898360]
